# Supplementary material
Source: JCI journal article supplement (doi:10.1172/jci198414)
Supplement: sd1 [file 1]

# Supplementary Materials for

## Epitope-specific competitive ELISA predicts malaria transmission-blocking vaccine Pfs230D1 activity measured in standard membrane feeding assay

Cristina A. Meehan<sup>1,2</sup>, Matthew V. Cowles<sup>1</sup>, Robert D. Morrison<sup>1</sup>, Yuyan Yi<sup>3</sup>, Jingwen Gu<sup>3</sup>, Jen. C. C. Hume<sup>1</sup>, Mina P. Peyton<sup>3</sup>, Issaka Sagara<sup>4,5</sup>, Sara A. Healy<sup>1</sup>, Jonathan P. Renn<sup>1</sup>, and Patrick E. Duffy<sup>1</sup>

Correspondence to: patrick.duffy@nih.gov

### Supplementary Tables:

1. Summary of transmission reducing activity by timepoint, dosing group and TRA $\geq$ 80% subgroups.
2. P230Compete assay panel results stratified by baseline TRA.
3. Univariate logistic regression of single P230Compete assay results for %EU or %OD to predict TRA $\geq$ 80%.
4. Pairwise logistic regression of two P230Compete assay results for  $\Delta$ EU or  $\Delta$ OD to predict TRA $\geq$ 80%.
5. Multivariate logistic regression of three or more P230Compete assay results for  $\Delta$ EU or  $\Delta$ OD to predict TRA $\geq$ 80%.

### Supplementary Figures:

1. Human serum does not impact the blocking function of scFv.
2. TRA datasets used in P230Compete prediction analyses.
3. Distribution of EU<sub>Sera</sub> and OD<sub>Sera</sub> results across P230Compete assay panel post-dose three and four.
4. Correlation between P230Compete OD<sub>Sera</sub> results and Pfs230D1 titers measured by direct ELISA.
5. Correlation between the two P230Compete measurements of percent reduction and delta reduction.
6. P230Compete results correlated to TRA.
7. C<sub>1q</sub> levels differentiate high versus low TRA post-vaccination.
8. Workflow for statistical prediction model construction and analysis.
9. P230Compete prediction of TRA by receiver operator characteristic curves.
10. Correlation analysis of P230Compete results to assess multicollinearity for multivariate modeling.

**Table S1.** Summary of transmission reducing activity by timepoint, dosing group and TRA $\geq$ 80% subgroups.

| Analysis                     | Timepoint   | Group        | N           | TRA<br>Mean $\pm$ SD, (Min, Max) | TRA<br>Median | P-value |
|------------------------------|-------------|--------------|-------------|----------------------------------|---------------|---------|
| All Participants             | Post-Dose 3 | All          | 94          | 84.6 $\pm$ 23.4 (0.00, 100)      | 95.9          | p=0.838 |
|                              | Post-Dose 4 | All          | 77          | 84.3 $\pm$ 22.7 (0.00, 100)      | 94.7          |         |
|                              | Timepoint   | Group        | Count (%)   | TRA<br>Mean $\pm$ SD, (Min, Max) | TRA<br>Median |         |
| TRA $\geq$ 80%<br>Subgroup   | Post-Dose 3 | All (subset) | 25/94 (27%) | 94.9 $\pm$ 5.71, (80.8, 100)     | 98.6          |         |
|                              | Post-Dose 4 | All (subset) | 22/77 (29%) | 94.8 $\pm$ 5.82, (80.8, 100)     | 97.7          |         |
|                              | Timepoint   | Group        | N           | TRA<br>Mean $\pm$ SD, (Min, Max) | TRA<br>Median | P-value |
| Pfs230D1<br>Dosing<br>Groups | Post-Dose 3 | Full         | 48          | 89.3 $\pm$ 19.4, (3.90, 100)     | 95.8          | p=0.074 |
|                              | Post-Dose 3 | Fractional   | 46          | 79.8 $\pm$ 26.2, (0.00, 100)     | 94.0          |         |
|                              | Post-Dose 4 | Full         | 38          | 83.2 $\pm$ 24.0, (0.00, 100)     | 94.7          | p=0.984 |
|                              | Post-Dose 4 | Fractional   | 39          | 85.3 $\pm$ 21.5, (2.70, 100)     | 96.0          |         |

Transmission reducing activity (TRA) datasets measured by standard membrane feeding assay (SMFA) during the Pfs230D1 trial as reported in [14]. Results presented for all participants in the P230Compete analysis by timepoint, subgroup of participants with TRA $\geq$ 80%, and stratified by full and fractional dosing groups. Statistical comparisons of median rank of TRA values post-dose 3 and post-dose 4 were performed using the Mann–Whitney U test, as well as for data stratified by full versus fractional dosing groups.

**Table S2.** P230Compete assay panel results stratified by baseline TRA.

| Post-Dose 3 Results                 |                                  |                                  |         |
|-------------------------------------|----------------------------------|----------------------------------|---------|
|                                     | Group 1: Baseline TRA $\geq$ 80% | Group 2: No Baseline TRA $<$ 80% |         |
|                                     | TRA $\geq$ 80%, Count (%)        | TRA $<$ 80%, Count (%)           |         |
| Total Samples N=94                  | 25 (27%)                         | 69 (73%)                         |         |
| Standard Membrane Feeding Assay     |                                  |                                  |         |
|                                     | Mean $\pm$ SD (Min, Max)         | Mean $\pm$ SD (Min, Max)         | p-value |
| TRA (%)                             | 94.9 $\pm$ 5.71 (80.8, 100)      | 37.2 $\pm$ 27.4 (0, 78.1)        |         |
| Total IgG                           |                                  |                                  |         |
| EU <sub>F</sub> ( $\Delta$ EU)      | 375 $\pm$ 335 (50, 1444)         | 418 $\pm$ 384 (36, 2068)         | 0.595   |
| EU <sub>TOTAL</sub> (EU)            | 380 $\pm$ 189 (89, 799)          | 447 $\pm$ 445 (84, 2730)         | 0.306   |
| IgG subclass and complement binding |                                  |                                  |         |
| IgG1 <sub>F</sub> ( $\Delta$ OD)    | 0.59 $\pm$ 0.59 (0.00, 2.04)     | 0.54 $\pm$ 0.69 (0.00, 2.71)     | 0.733   |
| IgG3 <sub>F</sub> ( $\Delta$ OD)    | 0.16 $\pm$ 0.19 (0.00, 0.69)     | 0.22 $\pm$ 0.32 (0.00, 2.03)     | 0.33    |
| IgG4 <sub>F</sub> ( $\Delta$ OD)    | 0.01 $\pm$ 0.06 (0.00, 0.27)     | 0.01 $\pm$ 0.04 (0.00, 0.25)     | 0.94    |
| C1q <sub>F</sub> ( $\Delta$ OD)     | 0.42 $\pm$ 0.78 (0.00, 2.74)     | 0.48 $\pm$ 0.90 (0.00, 3.46)     | 0.752   |
| Post-Dose 4 Results                 |                                  |                                  |         |
|                                     | Group 1: Baseline TRA $\geq$ 80% | Group 2: No Baseline TRA $<$ 80% |         |
|                                     | TRA $\geq$ 80%, Count (%)        | TRA $<$ 80%, Count (%)           |         |
| Total Samples N=77                  | 23 (30%)                         | 54 (70%)                         |         |
| Standard Membrane Feeding Assay     |                                  |                                  |         |
|                                     | Mean $\pm$ SD (Min, Max)         | Mean $\pm$ SD (Min, Max)         |         |
| TRA (%)                             | 94.8 $\pm$ 5.82 (80.8, 100)      | 38.4 $\pm$ 28.0 (0, 78.1)        |         |
| Total IgG                           |                                  |                                  |         |
| EU <sub>F</sub> ( $\Delta$ EU)      | 531 $\pm$ 387 (42, 1746)         | 588 $\pm$ 637 (58, 3081)         | 0.631   |
| EU <sub>TOTAL</sub> (EU)            | 610 $\pm$ 494 (97, 2340)         | 616 $\pm$ 787 (61, 5132)         | 0.97    |
| IgG subclass and complement binding |                                  |                                  |         |
| IgG1 <sub>F</sub> ( $\Delta$ OD)    | 0.77 $\pm$ 0.45 (0.00, 1.70)     | 0.76 $\pm$ 0.59 (0.00, 2.57)     | 0.959   |
| IgG3 <sub>F</sub> ( $\Delta$ OD)    | 0.17 $\pm$ 0.22 (0.00, 0.77)     | 0.23 $\pm$ 0.44 (0.00, 3.08)     | 0.457   |
| IgG4 <sub>F</sub> ( $\Delta$ OD)    | 0.68 $\pm$ 0.69 (0.00, 2.00)     | 0.88 $\pm$ 0.72 (0.00, 2.35)     | 0.237   |
| C1q <sub>F</sub> ( $\Delta$ OD)     | 1.09 $\pm$ 1.38 (0.00, 3.28)     | 0.45 $\pm$ 0.89 (0.00, 3.36)     | 0.084   |

P230Compete results stratified into two groups based on TRA (TRA $\geq$ 80% vs  $<$ 80%). EU: ELISA units. P230Compete results for total IgG reported as  $\Delta$ EU and IgG isotyping and complement binding reported as  $\Delta$ OD. Continuous results analyzed by Welch's t-test.

**Table S3:** Univariate logistic regression of single P230Compete assay results for EU, %EU or %OD to predict TRA $\geq$ 80%.

| Post-Dose 3         |                        |                             |                       |                        |                        |                        |                |                                |                                |
|---------------------|------------------------|-----------------------------|-----------------------|------------------------|------------------------|------------------------|----------------|--------------------------------|--------------------------------|
|                     | AIC<br>(Mean $\pm$ SD) | Accuracy<br>(Mean $\pm$ SD) | F1<br>(Mean $\pm$ SD) | PPV<br>(Mean $\pm$ SD) | NPV<br>(Mean $\pm$ SD) | AUC<br>(Mean $\pm$ SD) | 95%CI<br>(AUC) | Sensitivity<br>(Mean $\pm$ SD) | Specificity<br>(Mean $\pm$ SD) |
| EU <sub>F</sub>     | 108 $\pm$ 10.6         | 0.70 $\pm$ 0.08             | 0.77 $\pm$ 0.072      | 0.91 $\pm$ 0.057       | 0.44 $\pm$ 0.15        | 0.81 $\pm$ 0.08        | [0.79, 0.83]   | 0.67 $\pm$ 0.12                | 0.78 $\pm$ 0.17                |
| EU <sub>TOTAL</sub> | 122 $\pm$ 7.61         | 0.65 $\pm$ 0.07             | 0.73 $\pm$ 0.064      | 0.87 $\pm$ 0.061       | 0.37 $\pm$ 0.12        | 0.77 $\pm$ 0.09        | [0.74, 0.79]   | 0.64 $\pm$ 0.09                | 0.67 $\pm$ 0.17                |
| IgG1 <sub>F</sub>   | 111 $\pm$ 8.57         | 0.72 $\pm$ 0.08             | 0.78 $\pm$ 0.071      | 0.93 $\pm$ 0.055       | 0.45 $\pm$ 0.12        | 0.79 $\pm$ 0.08        | [0.77, 0.81]   | 0.68 $\pm$ 0.10                | 0.82 $\pm$ 0.15                |
| IgG3 <sub>F</sub>   | 141 $\pm$ 5.04         | 0.49 $\pm$ 0.05             | 0.60 $\pm$ 0.065      | 0.75 $\pm$ 0.083       | 0.21 $\pm$ 0.10        | 0.58 $\pm$ 0.08        | [0.56, 0.60]   | 0.51 $\pm$ 0.09                | 0.44 $\pm$ 0.20                |
| IgG4 <sub>F</sub>   | 140 $\pm$ 5.81         | 0.62 $\pm$ 0.18             | 0.70 $\pm$ 0.26       | 0.71 $\pm$ 0.14        | 0.19 $\pm$ 0.16        | 0.49 $\pm$ 0.08        | [0.47, 0.51]   | 0.74 $\pm$ 0.30                | 0.21 $\pm$ 0.27                |
| C1 <sub>qF</sub>    | 89.2 $\pm$ 12.0        | 0.70 $\pm$ 0.08             | 0.76 $\pm$ 0.083      | 0.98 $\pm$ 0.04        | 0.42 $\pm$ 0.098       | 0.82 $\pm$ 0.06        | [0.80, 0.84]   | 0.63 $\pm$ 0.11                | 0.94 $\pm$ 0.11                |

  

| Post-Dose 4         |                        |                             |                       |                        |                        |                        |                |                                |                                |
|---------------------|------------------------|-----------------------------|-----------------------|------------------------|------------------------|------------------------|----------------|--------------------------------|--------------------------------|
|                     | AIC<br>(Mean $\pm$ SD) | Accuracy<br>(Mean $\pm$ SD) | F1<br>(Mean $\pm$ SD) | PPV<br>(Mean $\pm$ SD) | NPV<br>(Mean $\pm$ SD) | AUC<br>(Mean $\pm$ SD) | 95%CI<br>(AUC) | Sensitivity<br>(Mean $\pm$ SD) | Specificity<br>(Mean $\pm$ SD) |
| EU <sub>F</sub>     | 82.1 $\pm$ 8.67        | 0.68 $\pm$ 0.09             | 0.73 $\pm$ 0.10       | 0.83 $\pm$ 0.09        | 0.49 $\pm$ 0.17        | 0.81 $\pm$ 0.08        | [0.79, 0.83]   | 0.67 $\pm$ 0.14                | 0.67 $\pm$ 0.17                |
| EU <sub>TOTAL</sub> | 76.1 $\pm$ 7.96        | 0.72 $\pm$ 0.08             | 0.77 $\pm$ 0.09       | 0.88 $\pm$ 0.08        | 0.53 $\pm$ 0.15        | 0.84 $\pm$ 0.08        | [0.82, 0.86]   | 0.70 $\pm$ 0.12                | 0.78 $\pm$ 0.17                |
| IgG1 <sub>F</sub>   | 90.9 $\pm$ 7.79        | 0.73 $\pm$ 0.09             | 0.80 $\pm$ 0.07       | 0.80 $\pm$ 0.10        | 0.58 $\pm$ 0.18        | 0.74 $\pm$ 0.09        | [0.72, 0.77]   | 0.81 $\pm$ 0.11                | 0.55 $\pm$ 0.21                |
| IgG3 <sub>F</sub>   | 104 $\pm$ 6.15         | 0.51 $\pm$ 0.07             | 0.59 $\pm$ 0.10       | 0.70 $\pm$ 0.10        | 0.31 $\pm$ 0.12        | 0.59 $\pm$ 0.10        | [0.56, 0.62]   | 0.51 $\pm$ 0.11                | 0.50 $\pm$ 0.18                |
| IgG4 <sub>F</sub>   | 107 $\pm$ 5.36         | 0.46 $\pm$ 0.11             | 0.53 $\pm$ 0.16       | 0.64 $\pm$ 0.11        | 0.24 $\pm$ 0.12        | 0.58 $\pm$ 0.08        | [0.55, 0.60]   | 0.50 $\pm$ 0.21                | 0.39 $\pm$ 0.23                |
| C1 <sub>qF</sub>    | 71.3 $\pm$ 5.34        | 0.63 $\pm$ 0.08             | 0.66 $\pm$ 0.10       | 0.90 $\pm$ 0.09        | 0.45 $\pm$ 0.11        | 0.74 $\pm$ 0.07        | [0.72, 0.77]   | 0.53 $\pm$ 0.12                | 0.87 $\pm$ 0.13                |

Univariate analysis for %EU/%OD for EU<sub>F</sub>, IgG1<sub>F</sub>, IgG3<sub>F</sub>, IgG4<sub>F</sub>, C1<sub>qF</sub>, and Pfs230D1 titers (EU<sub>TOTAL</sub>).

Statistical results reported for akaike information criterion (AIC), accuracy, F1 score (F1), positive predictive value (PPV), negative predictive value (NPV), 95% CI of AUC, sensitivity and specificity.

**Table S4:** Pairwise logistic regression of two P230Compete assay results for EU,  $\Delta$ EU or  $\Delta$ OD to predict TRA $\geq$ 80%.

| Post-Dose 3                            |                        |                             |                       |                        |                        |                        |              |
|----------------------------------------|------------------------|-----------------------------|-----------------------|------------------------|------------------------|------------------------|--------------|
| Metric                                 | AIC<br>(Mean $\pm$ SD) | Accuracy<br>(Mean $\pm$ SD) | F1<br>(Mean $\pm$ SD) | PPV<br>(Mean $\pm$ SD) | NPV<br>(Mean $\pm$ SD) | AUC<br>(Mean $\pm$ SD) | 95%CI (AUC)  |
| IgG1 <sub>F</sub> +IgG3 <sub>F</sub>   | 94.8 $\pm$ 8.82        | 0.72 $\pm$ 0.08             | 0.79 $\pm$ 0.07       | 0.92 $\pm$ 0.05        | 0.45 $\pm$ 0.12        | 0.83 $\pm$ 0.07        | [0.82, 0.85] |
| IgG1 <sub>F</sub> +IgG4 <sub>F</sub>   | 95.3 $\pm$ 9.24        | 0.72 $\pm$ 0.08             | 0.78 $\pm$ 0.08       | 0.95 $\pm$ 0.05        | 0.46 $\pm$ 0.13        | 0.81 $\pm$ 0.08        | [0.79, 0.83] |
| IgG1 <sub>F</sub> +EU <sub>F</sub>     | 94.9 $\pm$ 10.9        | 0.75 $\pm$ 0.07             | 0.81 $\pm$ 0.06       | 0.94 $\pm$ 0.06        | 0.49 $\pm$ 0.14        | 0.86 $\pm$ 0.07        | [0.84, 0.88] |
| IgG1 <sub>F</sub> +EU <sub>TOTAL</sub> | 97.9 $\pm$ 9.37        | 0.73 $\pm$ 0.07             | 0.79 $\pm$ 0.07       | 0.95 $\pm$ 0.05        | 0.47 $\pm$ 0.12        | 0.85 $\pm$ 0.07        | [0.83, 0.87] |
| IgG3 <sub>F</sub> +IgG4 <sub>F</sub>   | 138 $\pm$ 5.11         | 0.51 $\pm$ 0.12             | 0.60 $\pm$ 0.13       | 0.77 $\pm$ 0.09        | 0.22 $\pm$ 0.12        | 0.57 $\pm$ 0.08        | [0.55, 0.60] |
| IgG3 <sub>F</sub> +EU <sub>F</sub>     | 110 $\pm$ 10.0         | 0.71 $\pm$ 0.08             | 0.78 $\pm$ 0.07       | 0.90 $\pm$ 0.06        | 0.44 $\pm$ 0.12        | 0.80 $\pm$ 0.09        | [0.78, 0.98] |
| IgG3 <sub>F</sub> +EU <sub>TOTAL</sub> | 119 $\pm$ 8.13         | 0.70 $\pm$ 0.07             | 0.78 $\pm$ 0.06       | 0.88 $\pm$ 0.07        | 0.41 $\pm$ 0.11        | 0.75 $\pm$ 0.10        | [0.72, 0.78] |
| IgG4 <sub>F</sub> +EU <sub>F</sub>     | 110 $\pm$ 10.7         | 0.73 $\pm$ 0.07             | 0.81 $\pm$ 0.06       | 0.90 $\pm$ 0.06        | 0.47 $\pm$ 0.17        | 0.79 $\pm$ 0.08        | [0.77, 0.82] |
| IgG4 <sub>F</sub> +EU <sub>TOTAL</sub> | 122 $\pm$ 8.33         | 0.69 $\pm$ 0.07             | 0.77 $\pm$ 0.06       | 0.87 $\pm$ 0.06        | 0.42 $\pm$ 0.14        | 0.75 $\pm$ 0.09        | [0.72, 0.78] |
| EU <sub>F</sub> +EU <sub>TOTAL</sub>   | 111 $\pm$ 10.3         | 0.73 $\pm$ 0.08             | 0.81 $\pm$ 0.06       | 0.90 $\pm$ 0.06        | 0.48 $\pm$ 0.16        | 0.80 $\pm$ 0.08        | [0.77, 0.82] |

| Post-Dose 4                            |                        |                             |                       |                        |                        |                        |              |
|----------------------------------------|------------------------|-----------------------------|-----------------------|------------------------|------------------------|------------------------|--------------|
| Metric                                 | AIC<br>(Mean $\pm$ SD) | Accuracy<br>(Mean $\pm$ SD) | F1<br>(Mean $\pm$ SD) | PPV<br>(Mean $\pm$ SD) | NPV<br>(Mean $\pm$ SD) | AUC<br>(Mean $\pm$ SD) | 95%CI (AUC)  |
| IgG1 <sub>F</sub> +IgG3 <sub>F</sub>   | 86.3 $\pm$ 7.81        | 0.70 $\pm$ 0.08             | 0.76 $\pm$ 0.08       | 0.85 $\pm$ 0.09        | 0.52 $\pm$ 0.13        | 0.79 $\pm$ 0.09        | [0.77, 0.82] |
| IgG1 <sub>F</sub> +IgG4 <sub>F</sub>   | 88.3 $\pm$ 7.27        | 0.70 $\pm$ 0.09             | 0.76 $\pm$ 0.09       | 0.84 $\pm$ 0.10        | 0.53 $\pm$ 0.15        | 0.77 $\pm$ 0.09        | [0.75, 0.80] |
| IgG1 <sub>F</sub> +EU <sub>F</sub>     | 72.9 $\pm$ 8.67        | 0.77 $\pm$ 0.08             | 0.82 $\pm$ 0.07       | 0.90 $\pm$ 0.07        | 0.60 $\pm$ 0.14        | 0.87 $\pm$ 0.05        | [0.86, 0.89] |
| IgG1 <sub>F</sub> +EU <sub>TOTAL</sub> | 67.0 $\pm$ 8.12        | 0.76 $\pm$ 0.08             | 0.81 $\pm$ 0.06       | 0.90 $\pm$ 0.08        | 0.59 $\pm$ 0.15        | 0.88 $\pm$ 0.06        | [0.87, 0.90] |
| IgG3 <sub>F</sub> +IgG4 <sub>F</sub>   | 105 $\pm$ 5.36         | 0.50 $\pm$ 0.08             | 0.54 $\pm$ 0.12       | 0.71 $\pm$ 0.11        | 0.33 $\pm$ 0.12        | 0.59 $\pm$ 0.07        | [0.58, 0.61] |
| IgG3 <sub>F</sub> +EU <sub>F</sub>     | 85.1 $\pm$ 9.06        | 0.69 $\pm$ 0.10             | 0.75 $\pm$ 0.10       | 0.83 $\pm$ 0.09        | 0.52 $\pm$ 0.18        | 0.79 $\pm$ 0.10        | [0.76, 0.82] |
| IgG3 <sub>F</sub> +EU <sub>TOTAL</sub> | 78.8 $\pm$ 8.31        | 0.72 $\pm$ 0.08             | 0.77 $\pm$ 0.08       | 0.85 $\pm$ 0.08        | 0.53 $\pm$ 0.15        | 0.82 $\pm$ 0.08        | [0.80, 0.84] |
| IgG4 <sub>F</sub> +EU <sub>F</sub>     | 84.8 $\pm$ 9.12        | 0.70 $\pm$ 0.10             | 0.76 $\pm$ 0.10       | 0.82 $\pm$ 0.08        | 0.53 $\pm$ 0.20        | 0.79 $\pm$ 0.08        | [0.76, 0.81] |
| IgG4 <sub>F</sub> +EU <sub>TOTAL</sub> | 76.8 $\pm$ 8.19        | 0.72 $\pm$ 0.07             | 0.78 $\pm$ 0.07       | 0.85 $\pm$ 0.07        | 0.53 $\pm$ 0.16        | 0.82 $\pm$ 0.09        | [0.80, 0.85] |
| EU <sub>F</sub> +EU <sub>TOTAL</sub>   | 76.7 $\pm$ 8.63        | 0.69 $\pm$ 0.08             | 0.75 $\pm$ 0.08       | 0.85 $\pm$ 0.07        | 0.50 $\pm$ 0.15        | 0.82 $\pm$ 0.08        | [0.80, 0.84] |

Combinations of two P230Compete assays to predict TRA $\geq$ 80% including results for EU<sub>F</sub> (analyzed as log-transformed  $\Delta$ EU), IgG1<sub>F</sub>, IgG3<sub>F</sub>, and IgG4<sub>F</sub> (analyzed as  $\Delta$ OD) and Pfs230D1 titers measured during the trial (EU<sub>TOTAL</sub>, analyzed as log-transformed EU). C1q<sub>F</sub> results were excluded from analyses due to smaller datasets with limited sample availability.

**Table S5:** Multivariate logistic regression of three or more P230Compete assay results for  $\Delta$ EU or  $\Delta$ OD to predict  $\text{TRA} \geq 80\%$ .

|                | AIC<br>(Mean $\pm$ SD) | Accuracy<br>(Mean $\pm$ SD) | F1<br>(Mean $\pm$ SD) | PPV<br>(Mean $\pm$ SD) | NPV<br>(Mean $\pm$ SD) | AUC<br>(Mean $\pm$ SD) | Optimal combination<br>of P230Compete                          |
|----------------|------------------------|-----------------------------|-----------------------|------------------------|------------------------|------------------------|----------------------------------------------------------------|
| Post<br>Dose 3 | 92.8 $\pm$ 9.23        | 0.75 $\pm$ 0.07             | 0.81 $\pm$ 0.07       | 0.92 $\pm$ 0.05        | 0.48 $\pm$ 0.13        | 0.85 $\pm$ 0.07        | EU <sub>F</sub> , IgG1 <sub>F</sub> , IgG3 <sub>F</sub>        |
| Post<br>Dose 4 | 68.0 $\pm$ 8.10        | 0.76 $\pm$ 0.07             | 0.81 $\pm$ 0.06       | 0.89 $\pm$ 0.08        | 0.58 $\pm$ 0.15        | 0.87 $\pm$ 0.06        | EU <sub>TOTAL</sub> , IgG1 <sub>F</sub> ,<br>IgG3 <sub>F</sub> |

Datasets included in the multivariate models were EU<sub>F</sub> ( $\Delta$ EU, log-transformed) and EU<sub>TOTAL</sub> (EU, log-transformed), as well as IgG1<sub>F</sub>, IgG3<sub>F</sub>, and IgG4<sub>F</sub> ( $\Delta$ OD), age and sex with the optimal multivariate model reported post-dose 3 and 4. C1<sub>qF</sub> results were excluded from multivariate analyses.

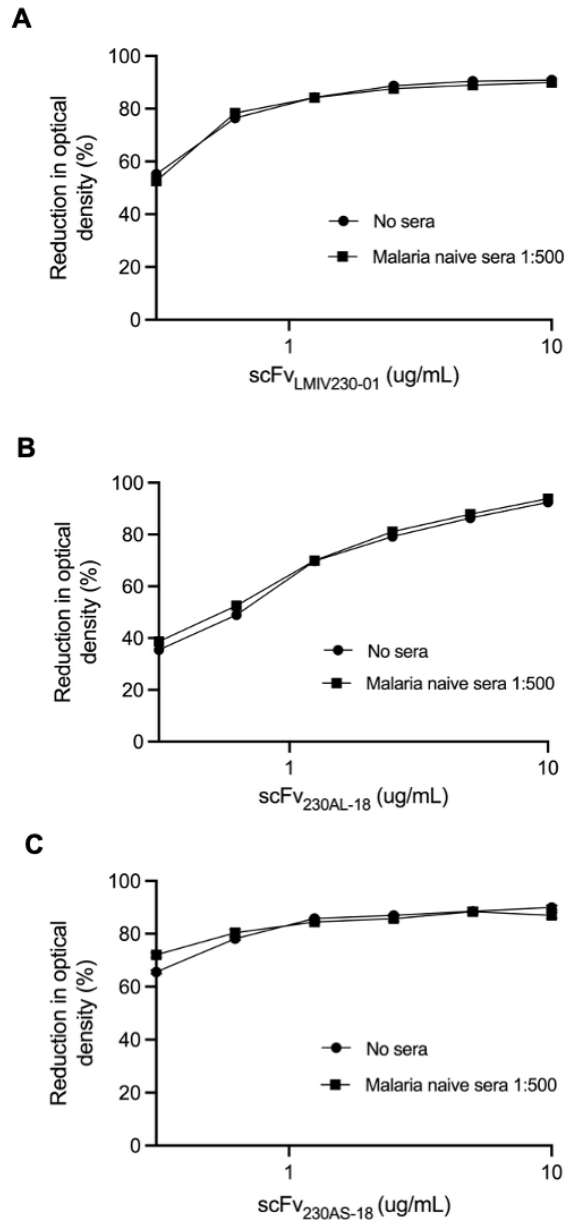

**Fig. S1. Human serum does not impact the blocking function of scFv.**

Competition experiments were performed with three single chain variable fragments (scFvs) with corresponding cognate human monoclonal antibody (hmAb) (A) LMIV230-01 (N=1), (B) 230AL-18 (N=3), and (C) 230AS-18 (N=1). The 3 scFvs were tested in a two-fold dilution series of 0-10  $\mu\text{g}/\text{mL}$  (x-axis) with a constant hmAb concentration of 0.1  $\mu\text{g}/\text{mL}$  in the presence (square) or absence (circle) of human malaria naïve sera. Y-axis is displacement of hmAb as percent reduction (%OD) relative to no scFv.

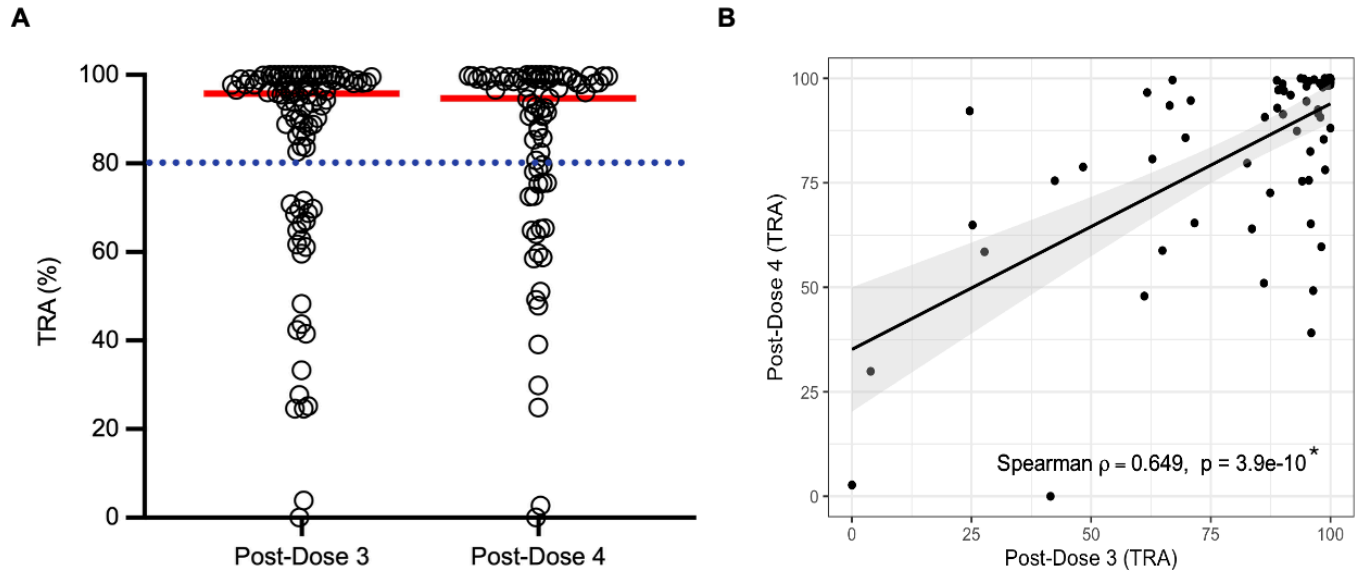

**Fig. S2. TRA datasets used in P230Compete prediction analyses.**

(A) Distribution of transmission reducing activity (TRA) values as measured by standard membrane feeding assay (SMFA) during the trial as reported in [14]. Black hollow circle indicated individual participant TRA value post-dose 3 (N = 94) and post-dose 4 (N = 77); red bars denote medians, and blue dashed line indicates  $\text{TRA} \geq 80\%$  threshold. (B) Scatter plot shows the relationship between TRA values post-dose 3 and post-dose 4. Linear regression line fitted using least squares (black line) with 95% confidence intervals (gray shading) calculated as the fitted mean response  $\pm 1.96$  times the standard error (SE), assuming normally distributed residuals. \* p-value calculated by Spearman rank correlation.

**A**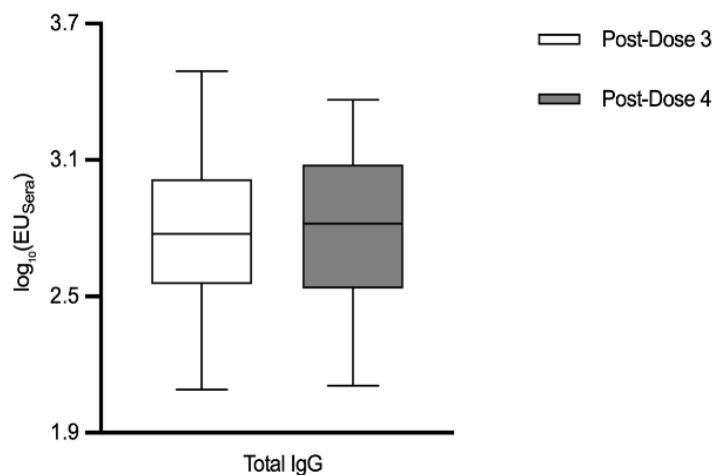**B**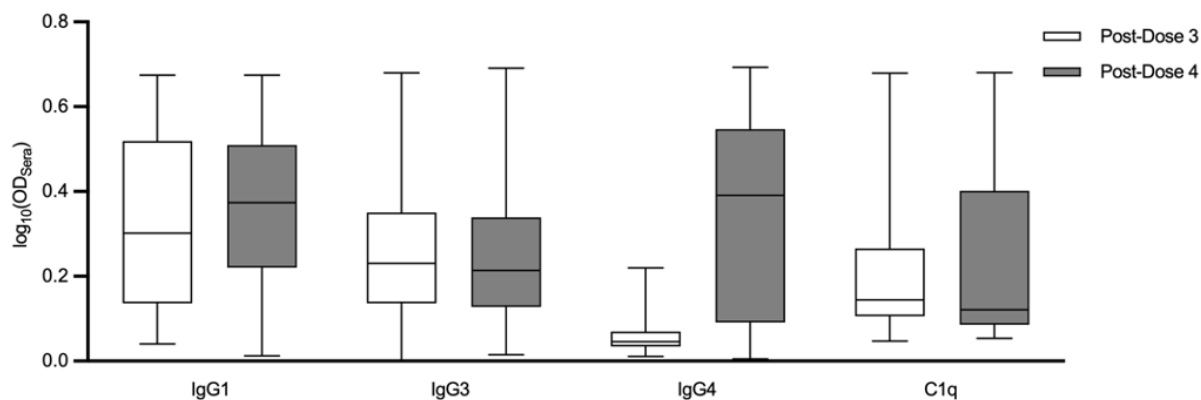

**Fig. S3. Distribution of  $\text{EU}_{\text{Sera}}$  and  $\text{OD}_{\text{Sera}}$  results across P230Compete assay panel post-dose three and four.** Box-and-whisker plots depict (A) total IgG results measured without scFv competitors (referred to as  $\text{EU}_{\text{Sera}}$ , expressed as log-transformed ELISA units: EU values), post-dose 3 (clear) and post-dose 4 (gray). (B) Results for  $\text{OD}_{\text{Sera}}$  values for IgG1, IgG3, IgG4, and C1q measured without scFv competitors (log-transformed) with box plot post-dose 3 (clear) and box plot post-dose 4 (gray). Box plots indicate IQR (25<sup>th</sup>-75<sup>th</sup> percentile), with the horizontal line (median). Whiskers extend to 1.5xIQR with no outliers beyond this range.

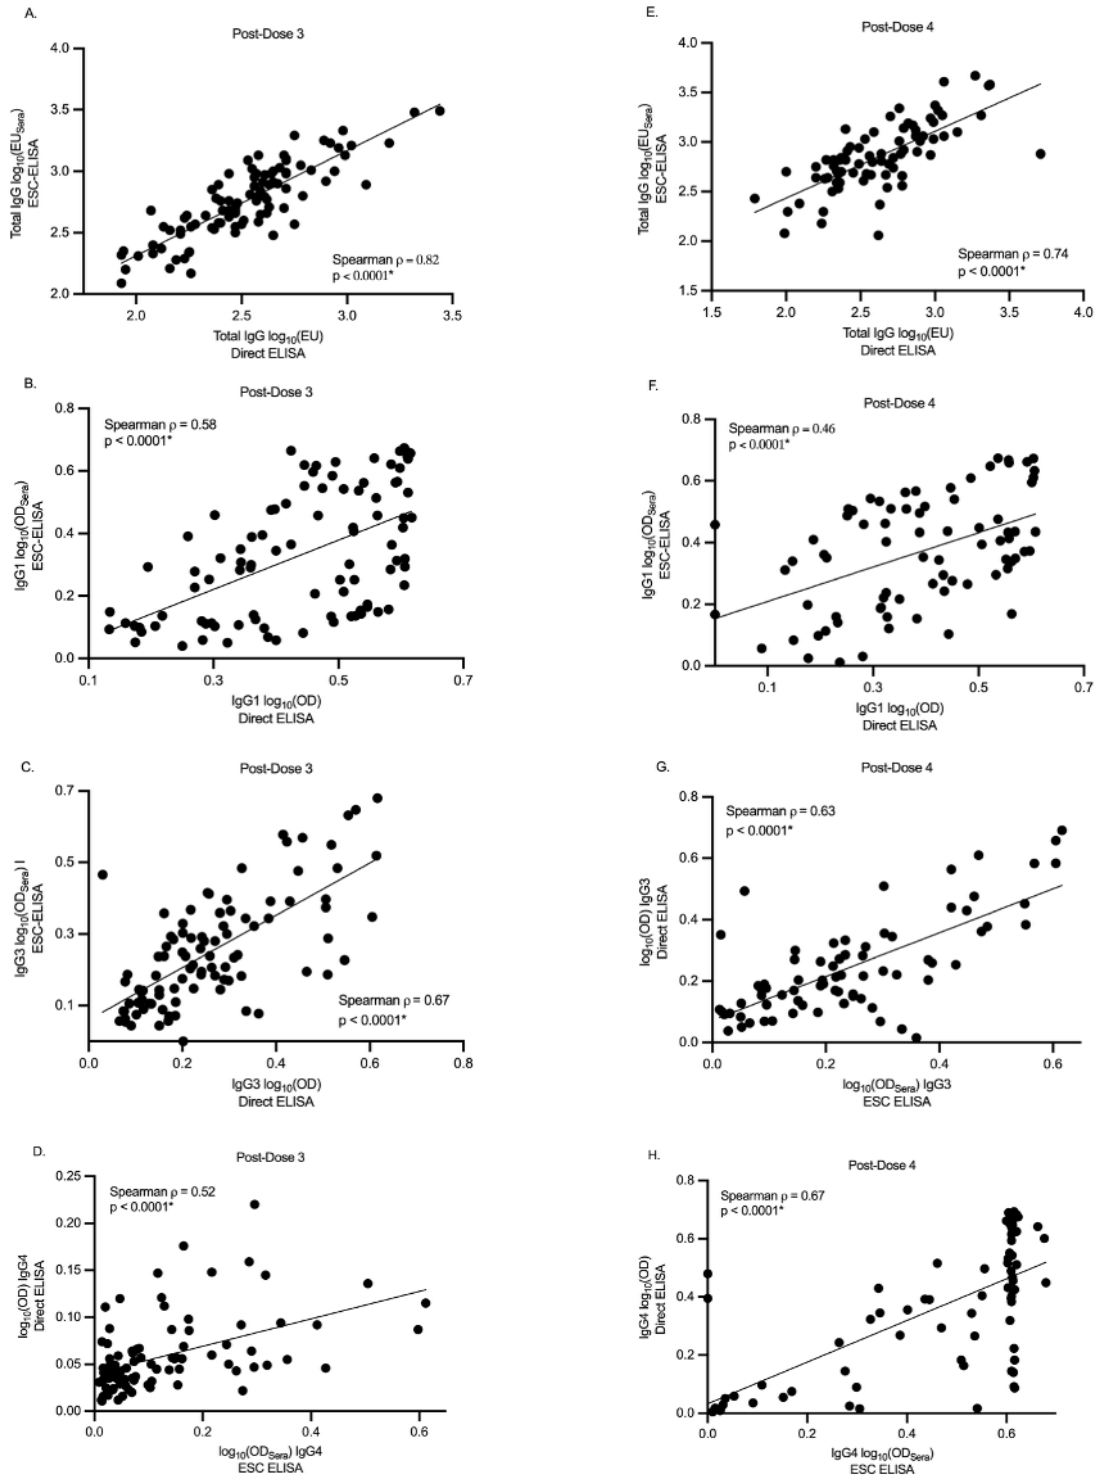

**Fig. S4. Correlation between P230Compete OD<sub>Sera</sub> results and Pfs230D1 titers measured by direct ELISA.** P230Compete epitope-specific ELISA (ESC-ELISA) measurements with no scFv competitor (OD<sub>Sera</sub>, x-axis) correlated to subclass Pfs230D1-specific titers measured by direct ELISA during the trial (y-axis) for total IgG and IgG subclasses. Each point represents the same serum sample measured for each assay platform; (A–D) Post-dose 3 (N = 94): (A) total IgG, (B) IgG1, (C) IgG3, (D) IgG4. (E–H) Post-dose 4 (N = 77): (E) total IgG, (F) IgG1, (G) IgG3, (H) IgG4. \* p-value calculated by Spearman rank correlation.

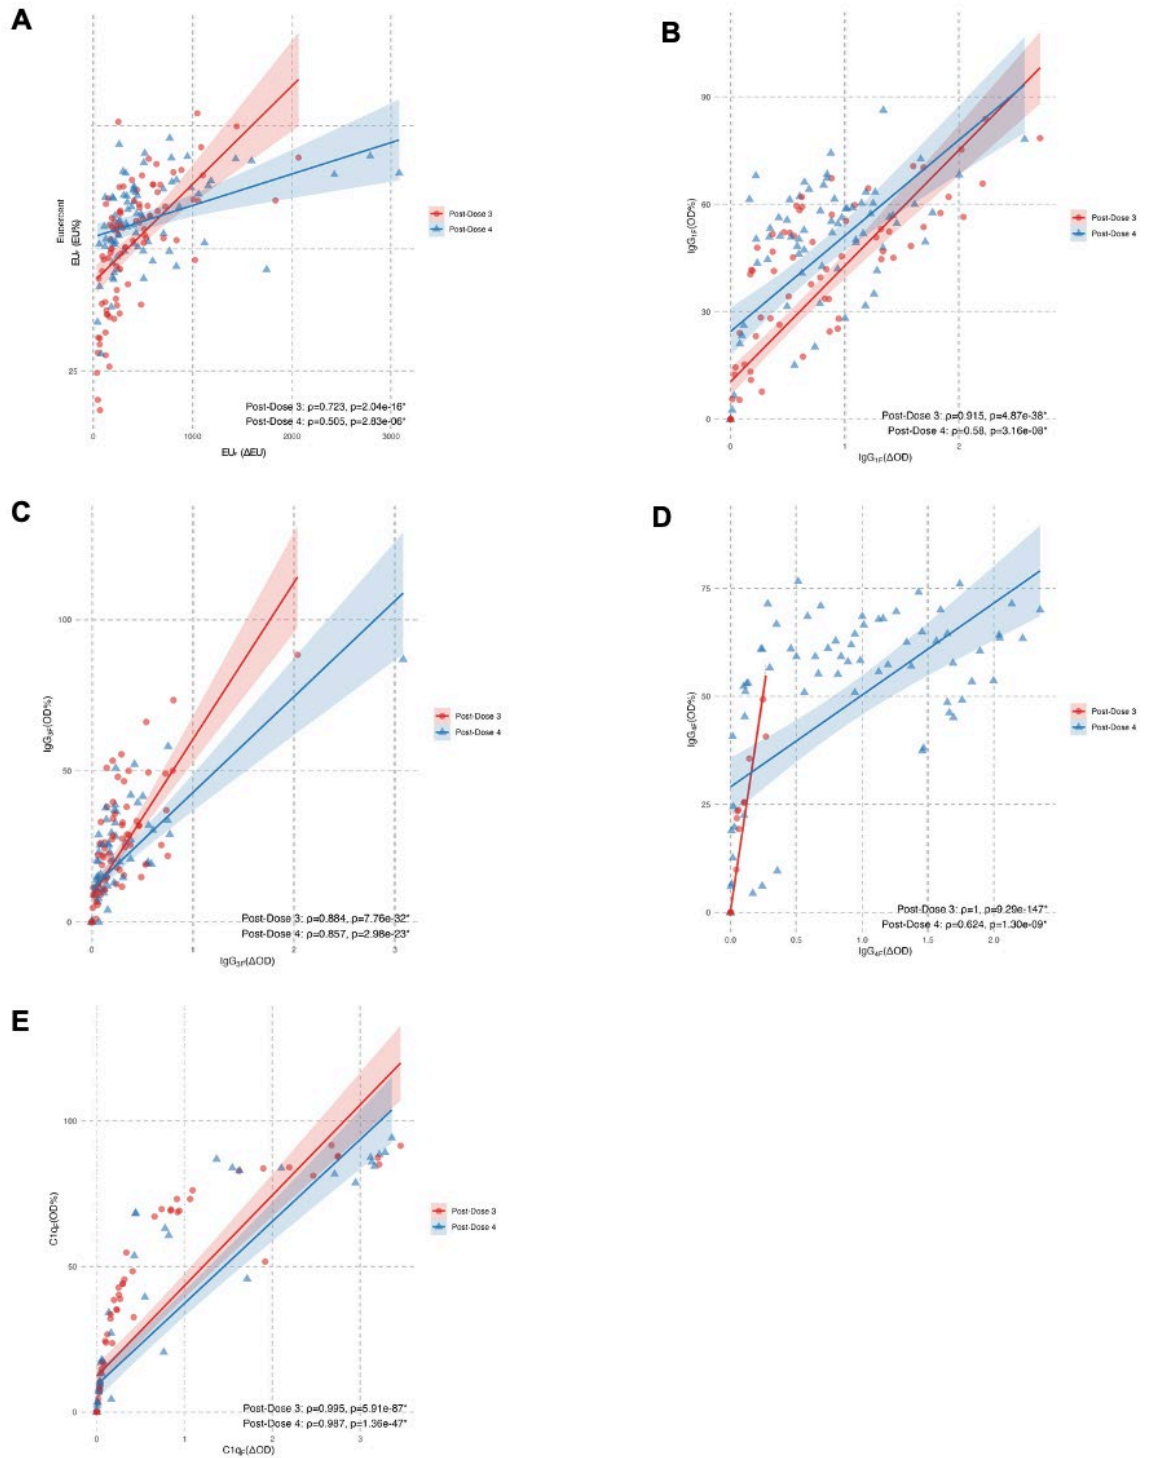

**Fig. S5. Correlation between the two P230Compete measurements of percent reduction and delta reduction.** Correlations of OD% vs  $\Delta$ OD and EU% vs  $\Delta$ EU, post-dose 3 (red circles; N = 94) and post-dose 4 (blue triangles; N = 77). (A) EU<sub>F</sub> (EU values plotted); (B) IgG<sub>1F</sub>, (C) IgG<sub>3F</sub>, (D) IgG<sub>4F</sub>, (E) C1q<sub>F</sub> (B-E: OD values plotted). Linear regression line fitted using least squares (red and blue lines) with 95% confidence intervals (red and blue shading) calculated as the fitted mean response  $\pm$  1.96 times the standard error (SE), assuming normally distributed residuals. \* p-value calculated by Spearman rank correlation.

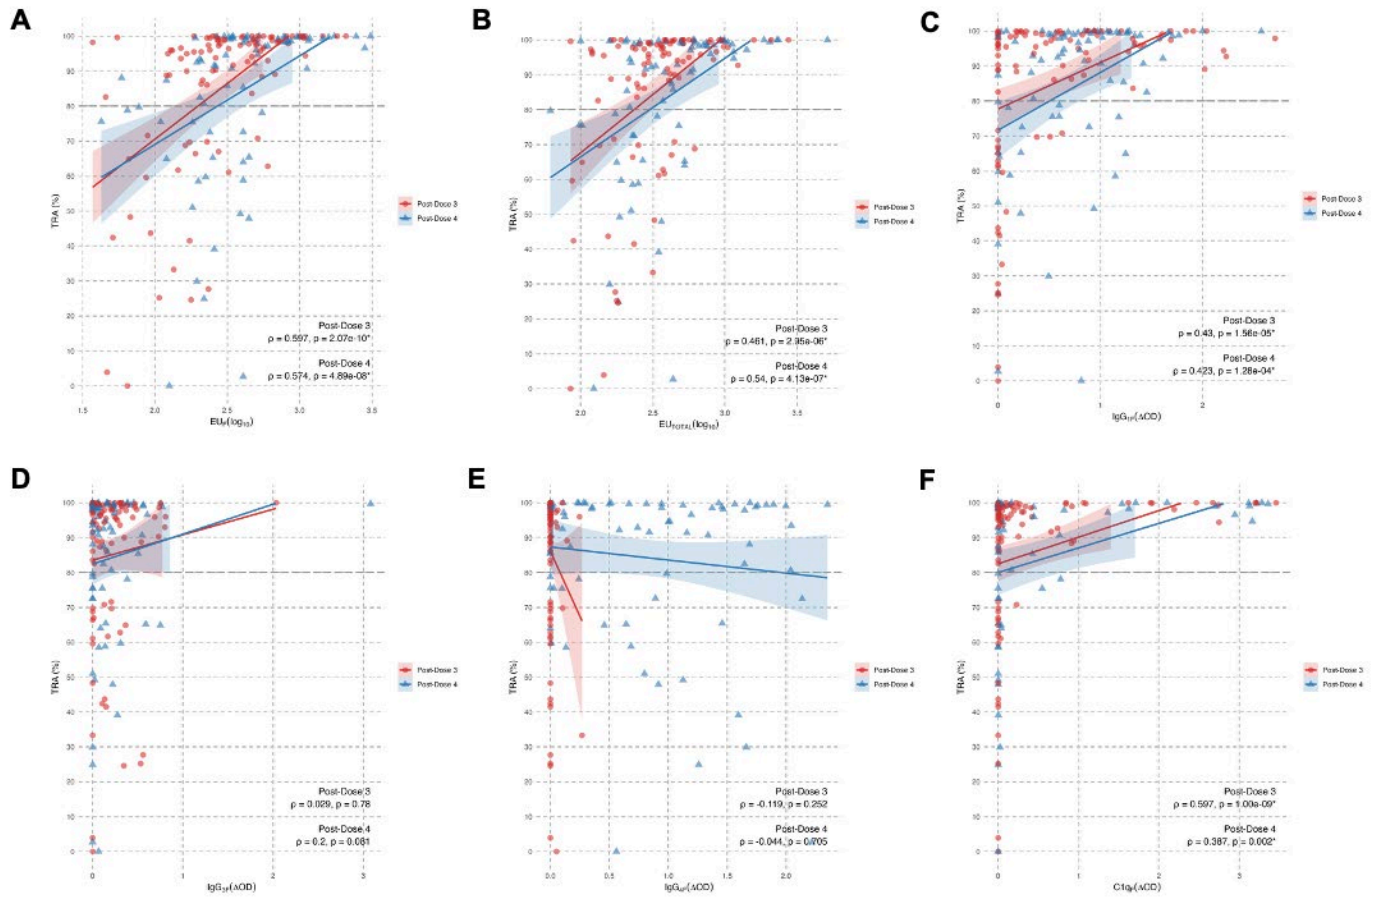

**Fig S6. P230Compete results correlated to TRA.**

Correlations of P230Compete levels vs. TRA (%), post-dose 3 (red circles; N = 94) and post-dose 4 (blue triangles; N = 77); gray dashed line represents the TRA ≥ 80% threshold. (A) EU<sub>F</sub> (ΔEU), (B) EU<sub>TOTAL</sub> (EU), (C) IgG1<sub>F</sub> (ΔOD), (D) IgG3<sub>F</sub> (ΔOD), (E) IgG4<sub>F</sub> (ΔOD), and (F) C1q<sub>F</sub> (ΔOD). Linear regression line fitted using least squares (red and blue lines) with 95% confidence intervals (red and blue shading) calculated as the fitted mean response ± 1.96 times the standard error (SE), assuming normally distributed residuals. \* p-value calculated by Spearman rank correlation.

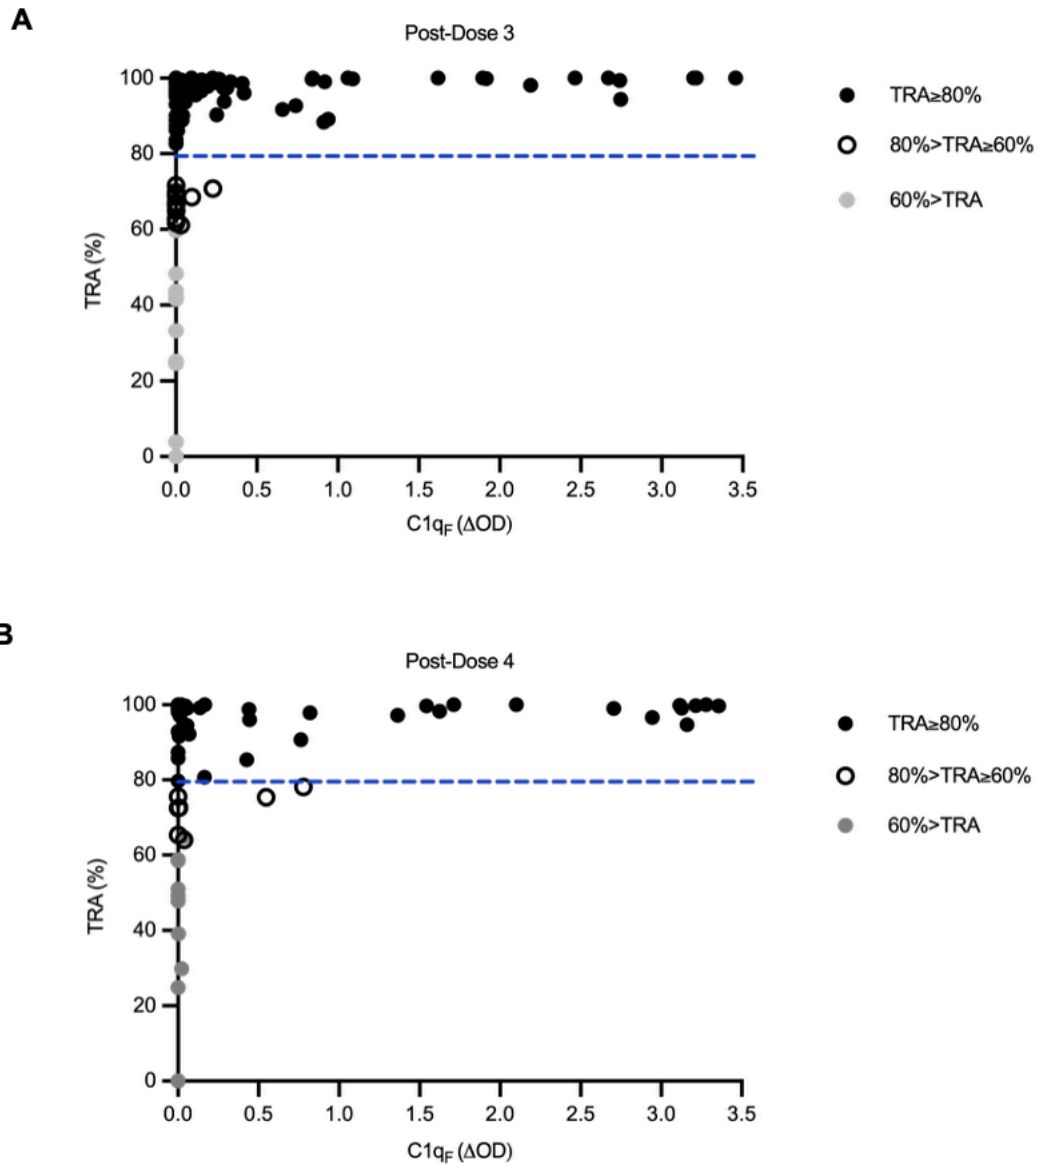

**Fig. S7. C1q<sub>F</sub> levels differentiate high versus low TRA post-vaccination.**

TRA (%) vs. C1q<sub>F</sub> (ΔOD): (A) post-dose 3 (N = 94), (B) post-dose 4 (N = 77). Samples grouped by TRA response high (TRA ≥ 80%; black circles), intermediate (60% ≤ TRA < 80%; black hollow circles), and low (TRA < 60%; gray circles). Dashed blue line represents the TRA ≥ 80% threshold.

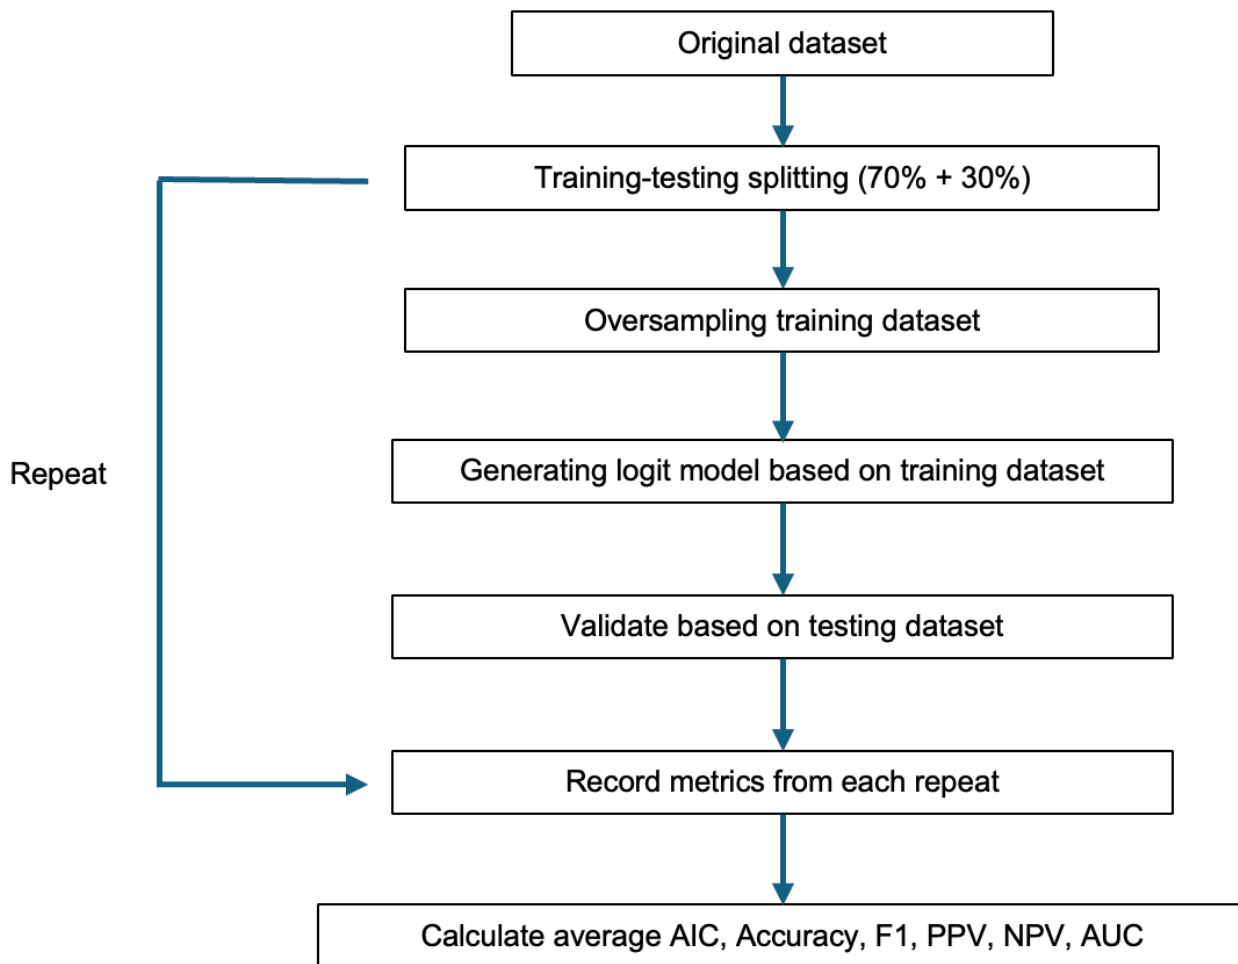

**Fig. S8. Workflow for statistical prediction model construction and analysis.**

Schematic of the statistical workflow used to construct and evaluate univariate, pairwise, and multivariate logistic regression models of P230Compete datasets to predict  $\text{TRA} \geq 80\%$ . For each analysis, the dataset was randomly split into 70% training and 30% testing subsets, with oversampling applied to the training set to address class imbalance. Logistic regression models were trained on the re-sampled training dataset and evaluated on the testing dataset. This process was repeated multiple times to ensure robustness. Performance metrics were averaged across iterations including accuracy, F1 score, positive predictive value (PPV), negative predictive value (NPV), and AUC.

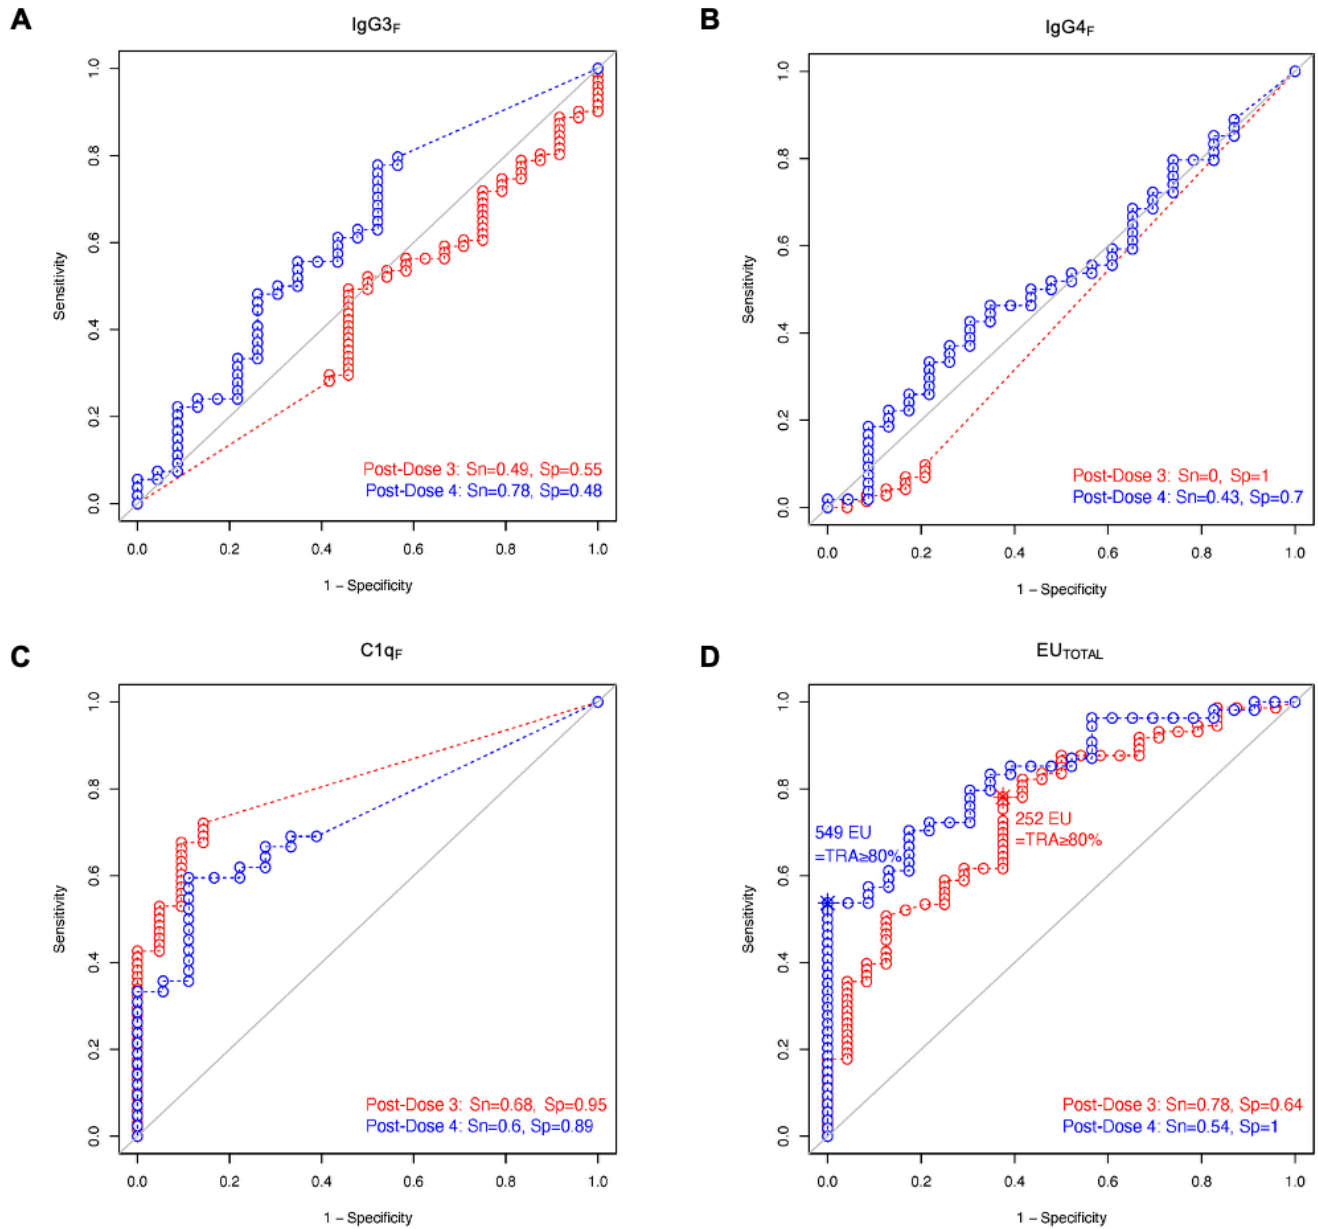

**Fig. S9. P230Compete prediction of TRA by receiver operating characteristic curves.** ROC curves for: (A) IgG<sub>3F</sub>, (B) IgG<sub>4F</sub>, (C) C1q<sub>F</sub>, (D) EU<sub>TOTAL</sub> (for comparison), post-dose 3 (red; N = 94) and post-dose 4 (blue; N = 77). IgG isotyping and C1q binding as  $\Delta$ OD and Pfs230D1 titers (EU<sub>TOTAL</sub>) plotted as EU. Optimal cutoffs not calculated for IgG<sub>3F</sub>, IgG<sub>4F</sub>, or C1q<sub>F</sub> (AUC<0.80). EU<sub>TOTAL</sub> cutoffs (in EU) marked on curve; gray diagonal line indicates AUC=0.5 (random classifier performance), Sn Sensitivity, Sp Specificity.

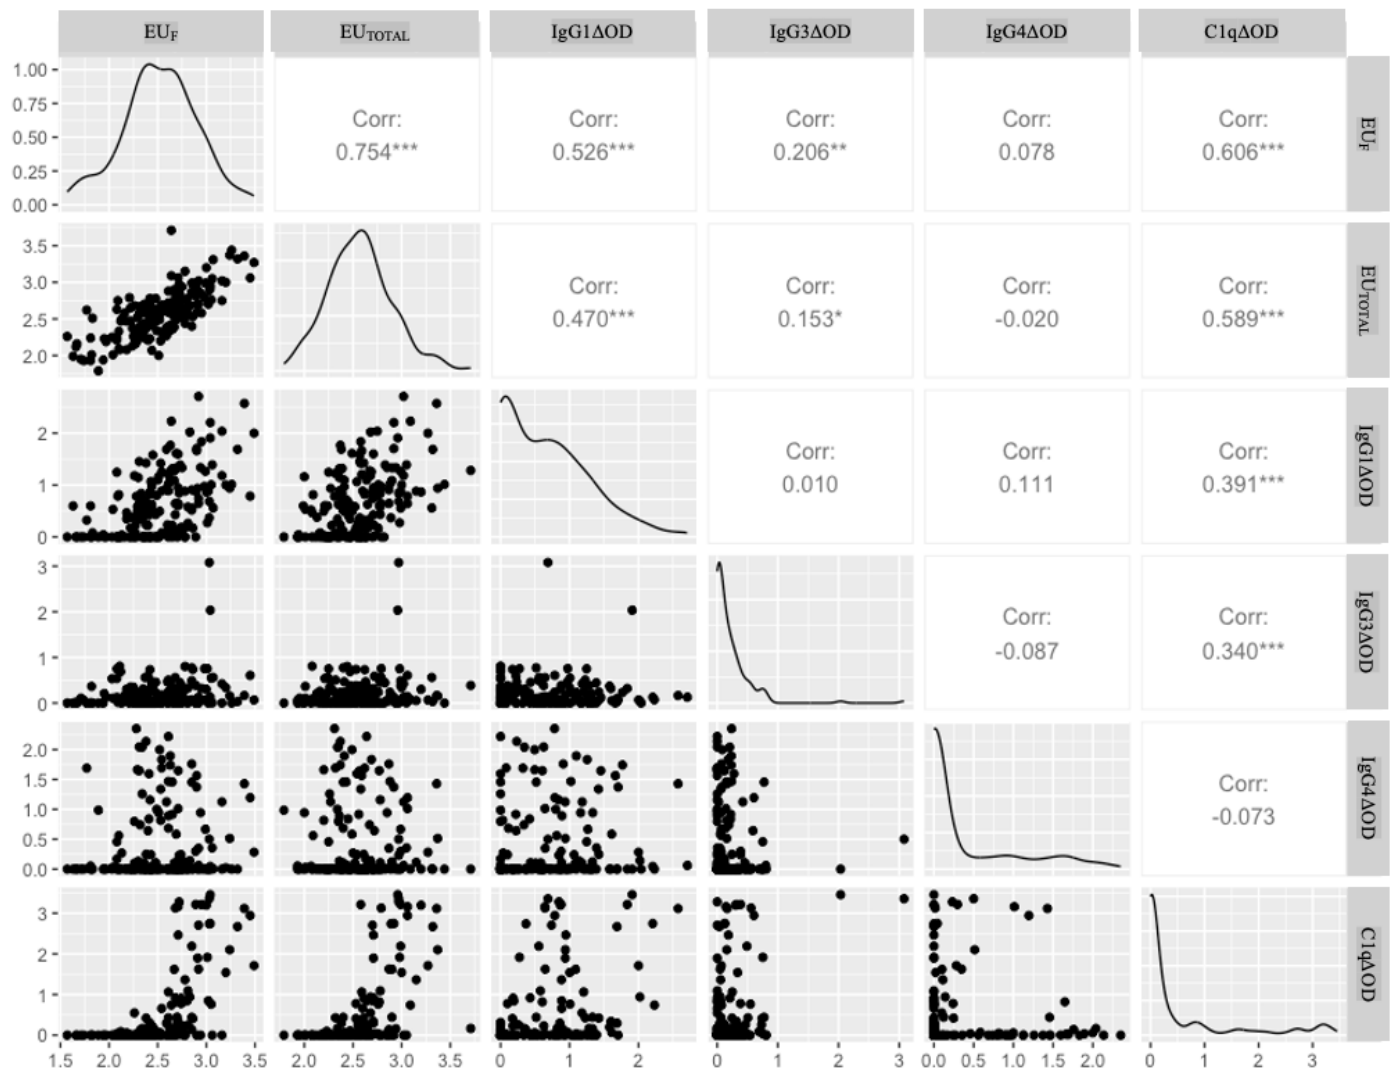

**Fig. S10. Correlation analysis of P230Compete results to assess multicollinearity for multivariate modeling.** Pairwise Spearman correlations across P230Compete assay panel datasets (EU<sub>F</sub> expressed as ΔEU, EU<sub>TOTAL</sub> expressed as EU, both datasets log-transformed). IgG and C1q datasets analyzed as ΔOD. Statistically significant Spearman rank correlations indicated by \*\*\*p < 0.001, \*\*p < 0.01, \*p < 0.05.
